# Supplementary material for: Investigating the binding of organic charge transfer co-crystals to human serum albumin by experimental and theoretical methods: spectroscopy, molecular docking and DFT/TD-DFT studies
Source: Royal Society of Chemistry journal article supplement (doi:10.1039/d3nj05194c), 2023-12-28
Supplement: d3nj05194c1.pdf [file d3nj05194c1.pdf]

### Supplementary Information

#### **Investigating binding of organic charge transfer co-crystal to human serum albumin by experimental and theoretical methods: Spectroscopy, molecular docking and DFT/TD-DFT studies**

Ishaat M. Khan<sup>\*a</sup>, Arshi Khan<sup>a</sup>, Sonam Shakya<sup>a</sup>, Mohammad Osama<sup>a</sup>, Maidul Islam<sup>a,b</sup>, Farha Naaz<sup>a</sup>, Musheer Ahmad<sup>c</sup>

<sup>a</sup> Department of Chemistry, Faculty of Science, Aligarh Muslim University, Aligarh-202002, India

<sup>b</sup> Research and Development Cell, Lovely Professional University, Phagwara, Punjab-144411, India

<sup>c</sup> Department of Applied Chemistry, Aligarh Muslim University, Aligarh 202002, India

**Table S1.** FT-IR Band Assignments (cm<sup>-1</sup>) for BTC, 2-EIM, and the CT Complex

| <b>Compound</b>                                 | <b>Frequency (cm<sup>-1</sup>)</b> | <b>Assignments</b> |
|-------------------------------------------------|------------------------------------|--------------------|
| <b>1,2,4,5-<br/>Benzenetetracarboxylic acid</b> | 3439                               | O-H (free)str      |
|                                                 | 1668                               | >C=O               |
|                                                 | 1613                               | >C=C<              |
|                                                 | 1350/1267/1309                     | >C-O str ,         |
|                                                 | 981                                | C-C str            |
|                                                 | 1449                               | OH bend            |
|                                                 | 850                                | C-O wag assym      |
|                                                 | 691                                | O-H tors           |
|                                                 | 570                                | C-C tors ,O-H tors |
|                                                 | <b>2 – Ethylimidazole</b>          | 3150               |
| 3108                                            |                                    | C-H str            |
| 1675                                            |                                    | C=C ,C=N           |
| 1575                                            |                                    | N-H bending        |
| 1453                                            |                                    | CH2 bending        |
| 1432                                            |                                    | C-N ring           |
| <b>CT complex</b>                               | 3122                               | O-H str            |
|                                                 | 1625                               | >C=O               |
|                                                 | 1537                               | >C=C<              |

**Table S2.** Fractional Atomic Coordinates ( $\times 10^4$ ) and Equivalent Isotropic Displacement Parameters ( $\text{\AA}^2 \times 10^3$ ) for CT complex.  $U_{\text{eq}}$  is defined as 1/3 of the trace of the orthogonalised  $U_{\text{ij}}$  tensor.

| Atom | x        | y          | z          | U(eq)   |
|------|----------|------------|------------|---------|
| O2   | 2764(3)  | 2358.1(11) | 5403.5(9)  | 47.9(4) |
| O3   | 5332(3)  | 5389.1(10) | 6727.9(8)  | 48.7(4) |
| O1   | -868(3)  | 2047.9(10) | 4533.8(9)  | 50.0(4) |
| O4   | 4349(3)  | 7000.6(10) | 6308.3(9)  | 53.2(4) |
| N1   | 7404(3)  | 2196.8(12) | 6512.5(9)  | 38.6(4) |
| N2   | 10862(3) | 1647.4(12) | 7315.6(10) | 39.3(4) |
| C9   | 1820(3)  | 5563.9(13) | 5593.0(9)  | 27.6(4) |
| C7   | 205(3)   | 3878.3(12) | 4926.6(9)  | 27.4(4) |
| C8   | 1929(3)  | 4468.9(13) | 5496.5(10) | 29.8(4) |
| C6   | 782(3)   | 2688.3(13) | 4956.4(10) | 33.0(4) |
| C10  | 3972(3)  | 6011.1(14) | 6257.7(10) | 31.7(4) |
| C3   | 8941(3)  | 1348.4(14) | 6711.9(11) | 36.5(4) |
| C1   | 8384(4)  | 3050.4(15) | 6983.3(12) | 44.1(5) |
| C2   | 10562(4) | 2702.0(16) | 7490.0(12) | 46.0(5) |
| C4   | 8682(4)  | 296.9(16)  | 6289.2(15) | 51.1(5) |
| C5   | 5847(4)  | -135.6(18) | 6166.6(16) | 58.1(6) |

**Table S3.** Anisotropic Displacement Parameters ( $\text{\AA}^2 \times 10^3$ ) for CT complex. The Anisotropic displacement factor exponent takes the form:  $-2\pi^2[h^2a^*2U_{11}+2hka^*b^*U_{12}+\dots]$ .

| Atom | $U_{11}$ | $U_{22}$ | $U_{33}$ | $U_{12}$ | $U_{13}$  | $U_{23}$ |
|------|----------|----------|----------|----------|-----------|----------|
| O2   | 43.9(8)  | 35.0(7)  | 57.3(8)  | 8.1(6)   | -25.0(6)  | -1.4(6)  |
| O3   | 51.5(8)  | 34.3(7)  | 50.7(8)  | -0.5(6)  | -33.6(6)  | 0.7(6)   |
| O1   | 52.4(8)  | 28.3(7)  | 60.4(9)  | -1.3(6)  | -29.7(7)  | -3.3(6)  |
| O4   | 53.4(9)  | 30.4(7)  | 65.6(9)  | -4.4(6)  | -35.1(7)  | -2.4(6)  |
| N1   | 32.2(8)  | 39.8(9)  | 39.2(8)  | 5.6(6)   | -14.6(6)  | 0.7(6)   |
| N2   | 33.9(8)  | 37.0(8)  | 42.0(8)  | 6.0(6)   | -15.5(6)  | 3.1(6)   |
| C9   | 24.9(7)  | 29.7(8)  | 25.7(7)  | -1.1(6)  | -7.1(6)   | -0.6(6)  |
| C7   | 25.6(7)  | 27.4(8)  | 27.1(7)  | -0.3(6)  | -5.8(6)   | 0.6(6)   |
| C8   | 26.4(8)  | 29.9(8)  | 30.0(8)  | 1.6(6)   | -9.6(6)   | 2.0(6)   |
| C6   | 33.3(9)  | 29.0(8)  | 33.6(8)  | 2.2(7)   | -9.4(7)   | -0.8(6)  |
| C10  | 28.4(8)  | 32.5(8)  | 30.6(8)  | -1.1(6)  | -10.6(6)  | -2.0(6)  |
| C3   | 29.1(8)  | 35.4(9)  | 41.7(9)  | 1.7(7)   | -9.0(7)   | 2.9(7)   |
| C1   | 46.0(10) | 34.6(10) | 47.5(10) | 9.6(8)   | -11.9(8)  | -2.6(8)  |
| C2   | 47.4(11) | 39.3(10) | 45.8(10) | 5.2(8)   | -17.5(9)  | -6.9(8)  |
| C4   | 39.8(10) | 39.5(11) | 70.0(14) | 1.9(8)   | -8.9(9)   | -6.4(10) |
| C5   | 47.0(12) | 46.5(12) | 75.9(15) | -1.9(10) | -12.8(11) | -7.6(11) |

**Table S4.** Bond Lengths for CT complex.

| Atom | Atom | Length/Å | Atom | Atom            | Length/Å |
|------|------|----------|------|-----------------|----------|
| O2   | C6   | 1.219(2) | C9   | C7 <sup>1</sup> | 1.413(2) |
| O3   | C10  | 1.232(2) | C9   | C8              | 1.391(2) |
| O1   | C6   | 1.284(2) | C9   | C10             | 1.524(2) |
| O4   | C10  | 1.262(2) | C7   | C8              | 1.391(2) |
| N1   | C3   | 1.330(2) | C7   | C6              | 1.527(2) |
| N1   | C1   | 1.370(2) | C3   | C4              | 1.488(3) |
| N2   | C3   | 1.330(2) | C1   | C2              | 1.346(3) |
| N2   | C2   | 1.370(2) | C4   | C5              | 1.498(3) |

**Table S5.** Bond Angles for CT complex.

| Atom | Atom | Atom            | Angle/°    | Atom | Atom | Atom | Angle/°    |
|------|------|-----------------|------------|------|------|------|------------|
| C1   | N1   | C3              | 110.10(15) | C7   | C6   | O1   | 119.72(14) |
| C2   | N2   | C3              | 109.78(15) | O4   | C10  | O3   | 121.55(14) |
| C8   | C9   | C7 <sup>1</sup> | 117.54(14) | C9   | C10  | O3   | 118.68(15) |
| C10  | C9   | C7 <sup>1</sup> | 128.14(15) | C9   | C10  | O4   | 119.76(14) |
| C10  | C9   | C8              | 114.32(14) | N2   | C3   | N1   | 106.69(16) |
| C8   | C7   | C9 <sup>1</sup> | 117.33(15) | C4   | C3   | N1   | 126.23(16) |
| C6   | C7   | C9 <sup>1</sup> | 128.66(14) | C4   | C3   | N2   | 126.90(16) |
| C6   | C7   | C8              | 114.01(13) | C2   | C1   | N1   | 106.45(16) |
| C7   | C8   | C9              | 125.13(14) | C1   | C2   | N2   | 106.97(16) |
| O1   | C6   | O2              | 120.96(16) | C5   | C4   | C3   | 114.35(18) |
| C7   | C6   | O2              | 119.27(15) |      |      |      |            |

**Table S6.** Hydrogen Atom Coordinates (Å×10<sup>4</sup>) and Isotropic Displacement Parameters (Å<sup>2</sup>×10<sup>3</sup>) for CT complex.

| Atom | x        | y          | z          | U(eq)   |
|------|----------|------------|------------|---------|
| H1   | 6000(3)  | 2208.1(12) | 6142.0(9)  | 46.4(5) |
| H2   | 12105(3) | 1240.1(12) | 7560.0(10) | 47.1(5) |
| H8   | 3259(3)  | 4102.8(13) | 5839.9(10) | 35.8(4) |
| H1a  | 7682(4)  | 3735.4(15) | 6957.8(12) | 52.9(6) |
| H2a  | 11656(4) | 3101.0(16) | 7883.6(12) | 55.2(6) |
| H4a  | 9335(4)  | 358.0(16)  | 5745.8(15) | 61.3(6) |
| H4b  | 9843(4)  | -206.1(16) | 6618.8(15) | 61.3(6) |
| H5a  | 4656(8)  | 374(6)     | 5869(10)   | 87.1(9) |
| H5b  | 5816(8)  | -781(7)    | 5849(9)    | 87.1(9) |
| H5c  | 5253(14) | -276(13)   | 6703.0(16) | 87.1(9) |

**Table S7.** BTC, 2-EIM, and [(BTC)(2-EIM)] CT complex weight loss (%), enthalpy (H), and degradation temperature (T).

| Step | 1,24,5-benzenetetracarboxylic acid Weight loss (%) | T (°C) | $\Delta H$ (J/g) | 2-Ethylimidazol Weight loss (%) | T(°C) | $\Delta H$ (J/g) | CT(complex) Weight loss (%) | T (°C) | $\Delta H$ (J/g) |
|------|----------------------------------------------------|--------|------------------|---------------------------------|-------|------------------|-----------------------------|--------|------------------|
| 1    | -14.03                                             | 92.0   | -                | 99.8                            | 222   | -                | -86.95                      | 234.5  | -                |
|      | -87.30                                             | 4      | 99.8             |                                 |       | 06.27            |                             | 5      | 109.             |
|      |                                                    | 290.   | 1                |                                 |       |                  |                             |        | 4                |
|      |                                                    | 8      | -                |                                 |       |                  |                             |        |                  |
|      |                                                    |        | 18.6             |                                 |       |                  |                             |        |                  |
|      |                                                    | 2      |                  |                                 |       |                  |                             |        |                  |

**Table S8.** Docking log file of HAS-CT complex system (saving top 9 orientations),  $E_{\min} = -8.8$  kcal/mol.

| mode | affinity   | dist from best mode |          |
|------|------------|---------------------|----------|
|      | (kcal/mol) | rmsdl.b.            | rmsdu.b. |
| 1    | -8.8       | 0.000               | 0.000    |
| 2    | -8.2       | 1.876               | 3.685    |
| 3    | -8.2       | 2.239               | 3.086    |
| 4    | -8.0       | 1.554               | 3.759    |
| 5    | -7.9       | 14.290              | 16.498   |
| 6    | -7.7       | 18.464              | 20.554   |
| 7    | -7.6       | 4.343               | 7.135    |
| 8    | -7.5       | 19.653              | 21.920   |
| 9    | -7.3       | 19.415              | 23.412   |

**Steady-state fluorescence study of HSA with CTC; excitation of Tryptophan only:**

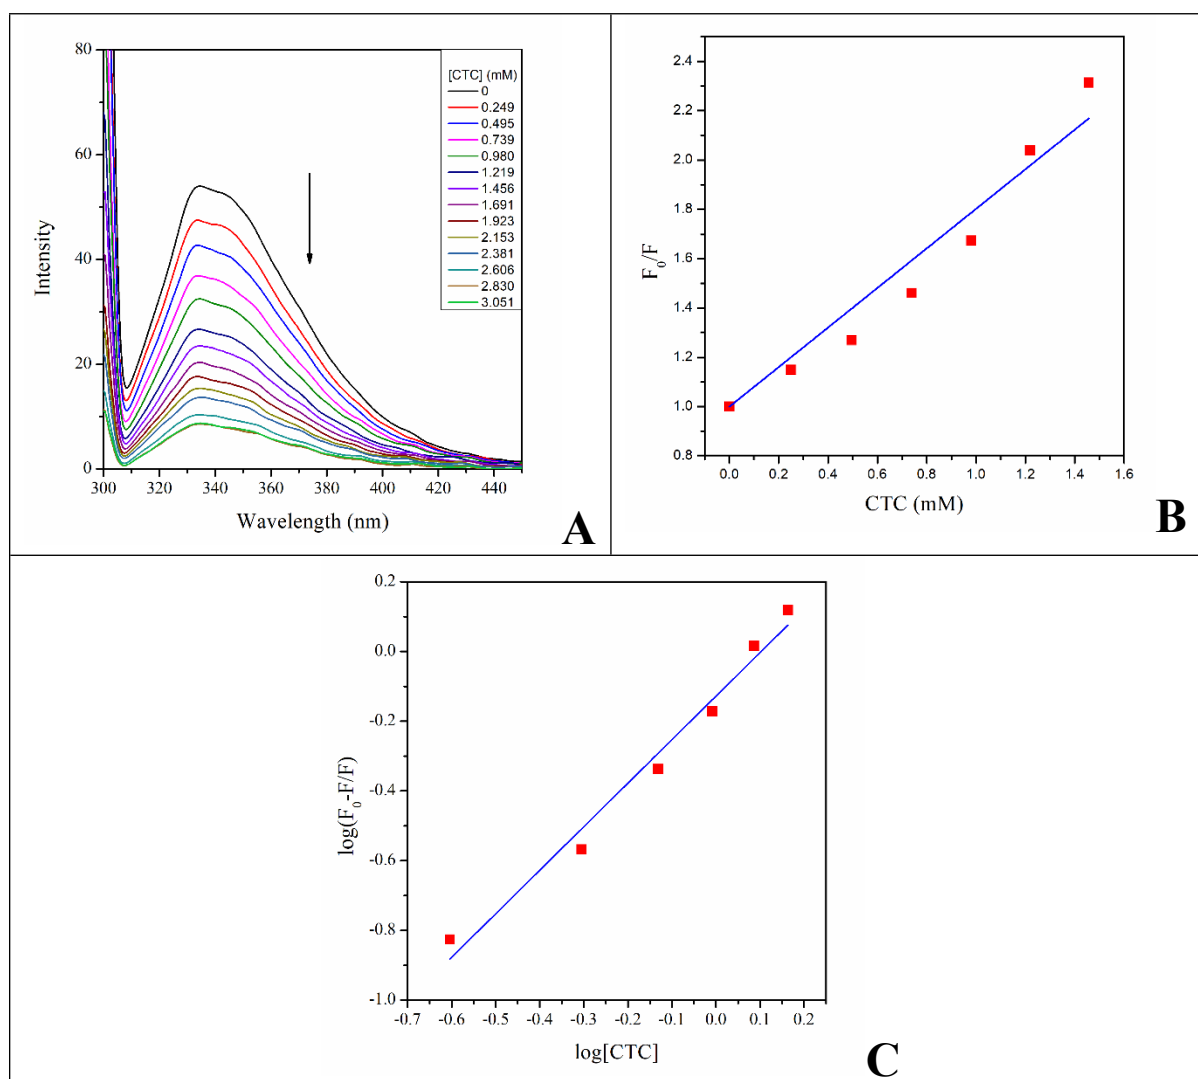

**Figure S1.** Tryptophan excitation of HSA at 295 nm and its titration with CTC; [A] quenching of the intensity maxima of HSA upon addition of CTC, [B] Stern-volmer plot, [C] modern Stern-volmer plot for determination of binding constant.

**Table S9.** Quenching and binding parameters obtained for HSA and CTC interaction from spectrofluorometric study

|            | $K_{SV}(M^{-1})$   | $k_q(M^{-1}s^{-1})$   | $R^2$ | $K_b(M^{-1})$      | n    | $R^2$ | $\Delta G (kJ mol^{-1})$ |
|------------|--------------------|-----------------------|-------|--------------------|------|-------|--------------------------|
| CT Complex | $8.02 \times 10^2$ | $8.02 \times 10^{10}$ | 0.99  | $7.44 \times 10^2$ | 1.24 | 0.98  | -16.384                  |

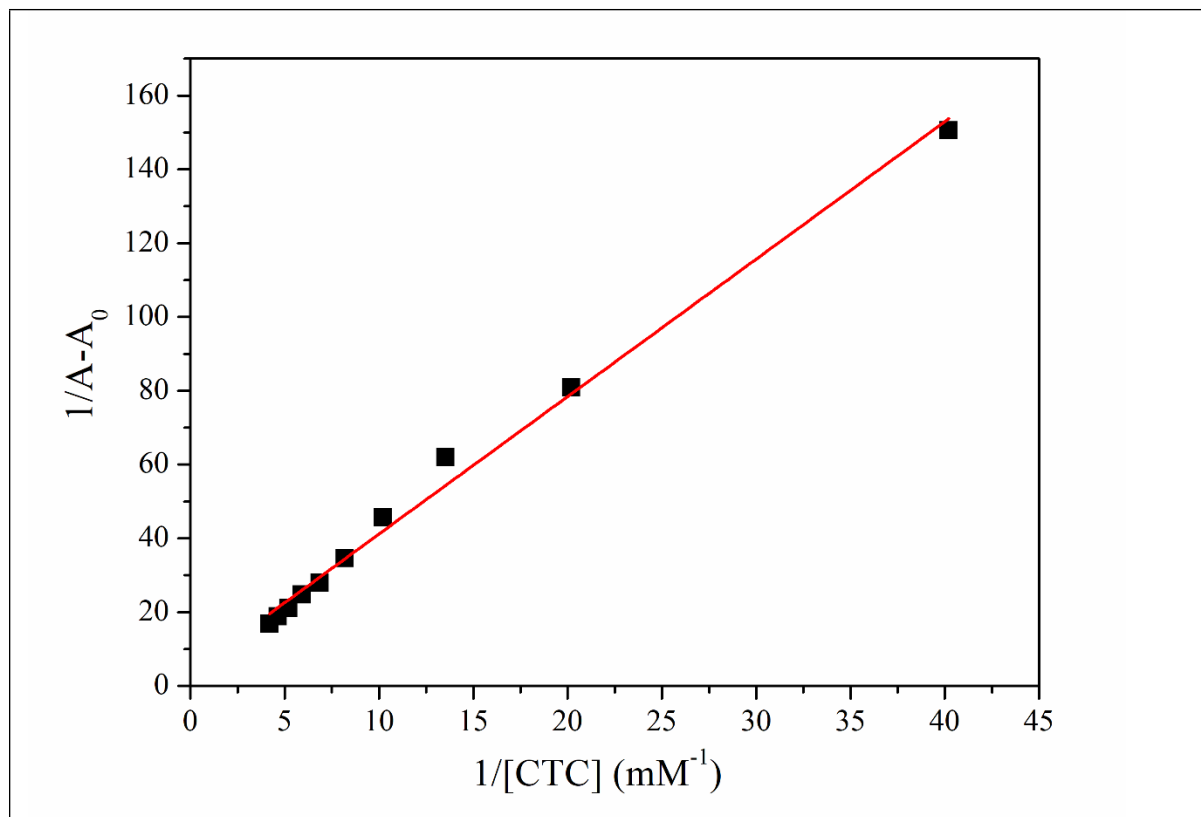

**Figure S2.** The Benesi–Hildebrand plots to determine binding constant using changes in absorption spectra of HAS-CT complex.
